# Supplementary material
Source: publisher figshare collection journal article supplement (https://frontiersin.figshare.com/ndownloader/files/24231005)
Supplement: Supplementary file [file 24231005]

**Treatment and prevention of lung cancer using a Virus-Infected Reprogrammed  
Somatic cell-derived Tumor cell vaccination (VIREST) regime**

**Running Title:** Stem cell-based lung cancer vaccination

Zhe Zhang<sup>1</sup>, Shuangshuang Lu<sup>2</sup>, L S Chard Dunmall<sup>3</sup>, Zhizhong Wang<sup>2</sup>, Zhenguo Cheng<sup>2</sup>,  
Zhongxian Zhang<sup>2</sup>, Wenli Yan<sup>2</sup>, Yongchao Chu<sup>2</sup>, Dongling Gao<sup>2</sup>, Na Wang<sup>2</sup>, Yang Li<sup>2</sup>, Jiwei  
Wang<sup>2</sup>, Yuenan Li<sup>2</sup>, Yupei Ji<sup>2</sup>, Danyang Shan<sup>2</sup>, Keke Li<sup>2</sup>, Panpan Wang<sup>2</sup>, Yunshu Dong<sup>4</sup>,  
Jianzeng Dong<sup>5</sup>, Nick R Lemoine<sup>2,3</sup>, Duanqing Pei<sup>6</sup>, Lirong Zhang<sup>7#</sup>, and Yaohe Wang<sup>2,3#</sup>

**Supplementary Figures and Tables**

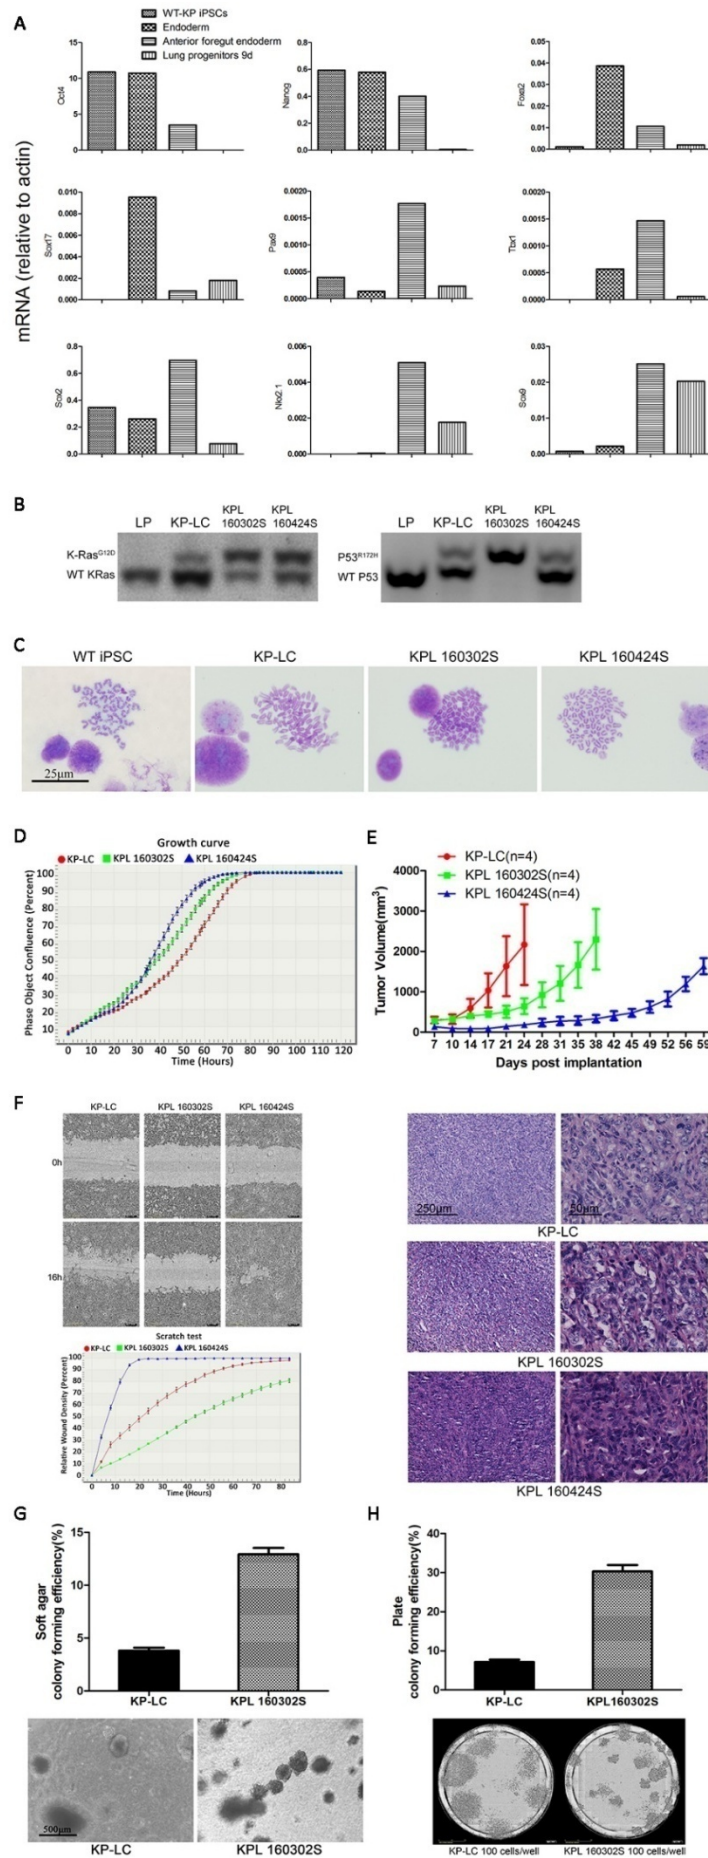

**Figure S1. iPS cells from KP littermate mice can be induced to lung cancer cells. (A)**

Expression of markers for iPSC (Oct4, Nanog, Sox2), endoderm (Foxa2, Sox17), anterior foregut endoderm (Pax9, Tbx1, Sox2, Nkx2.1) and lung progenitors (Nkx2.1, Sox9) were monitored using qPCR. **(B)** Verification of removal of LSL cassette after lung progenitors were infected using Ad5-Cre. KP-LC has mutant bands of Kras and P53 caused by infection of Ad5-Cre activating expression of the mutations. KPL 160302S and KPL 160424S are lung adenocarcinoma cell lines from KP mice (LSL-Kras<sup>G12D/+</sup>; LSL-Trp53<sup>R172H/+</sup>) who have received Ad-Cre intranasally. P53 LOH (loss-of-heterozygosity) occurred in KPL 160302S. **(C)** Karyotype analysis of KP-LC, KPL 160302S and KPL 160424S. WT iPSC was a normal control. KP-LC, KPL 160302S and KPL 160424S all had obvious chromosome number abnormalities. **(D)** Cell growth curve of KP-LC, KPL 160302S and KPL 160424S *in vitro*. **(E)** Subcutaneous tumor growth curve of B6 mice bearing KP-LC, KPL 160302S and KPL 160424S tumors with the initial dose of  $2 \times 10^6$  cells/ mouse. Mean $\pm$  SEM is shown. N=7/group. H&E staining of subcutaneous tumors is shown beneath the growth curve. **(F)** Representative wound healing pictures of KP-LC, KPL 160302S and KPL 160424S 0h and 16h after scratch. Relative wound density was analyzed by Incucyte. **(G)** Soft agar colony formation assay of KP-LC and KPL 160302S with the initial density of 2500/5000/10000 cells/well. Colony forming efficiency is shown (n=9). **(H)** Plate colony formation assay of KP-LC and KPL 160302S with the initial density of 50/100/200 cells/well. Colony forming efficiency is shown (n=18).

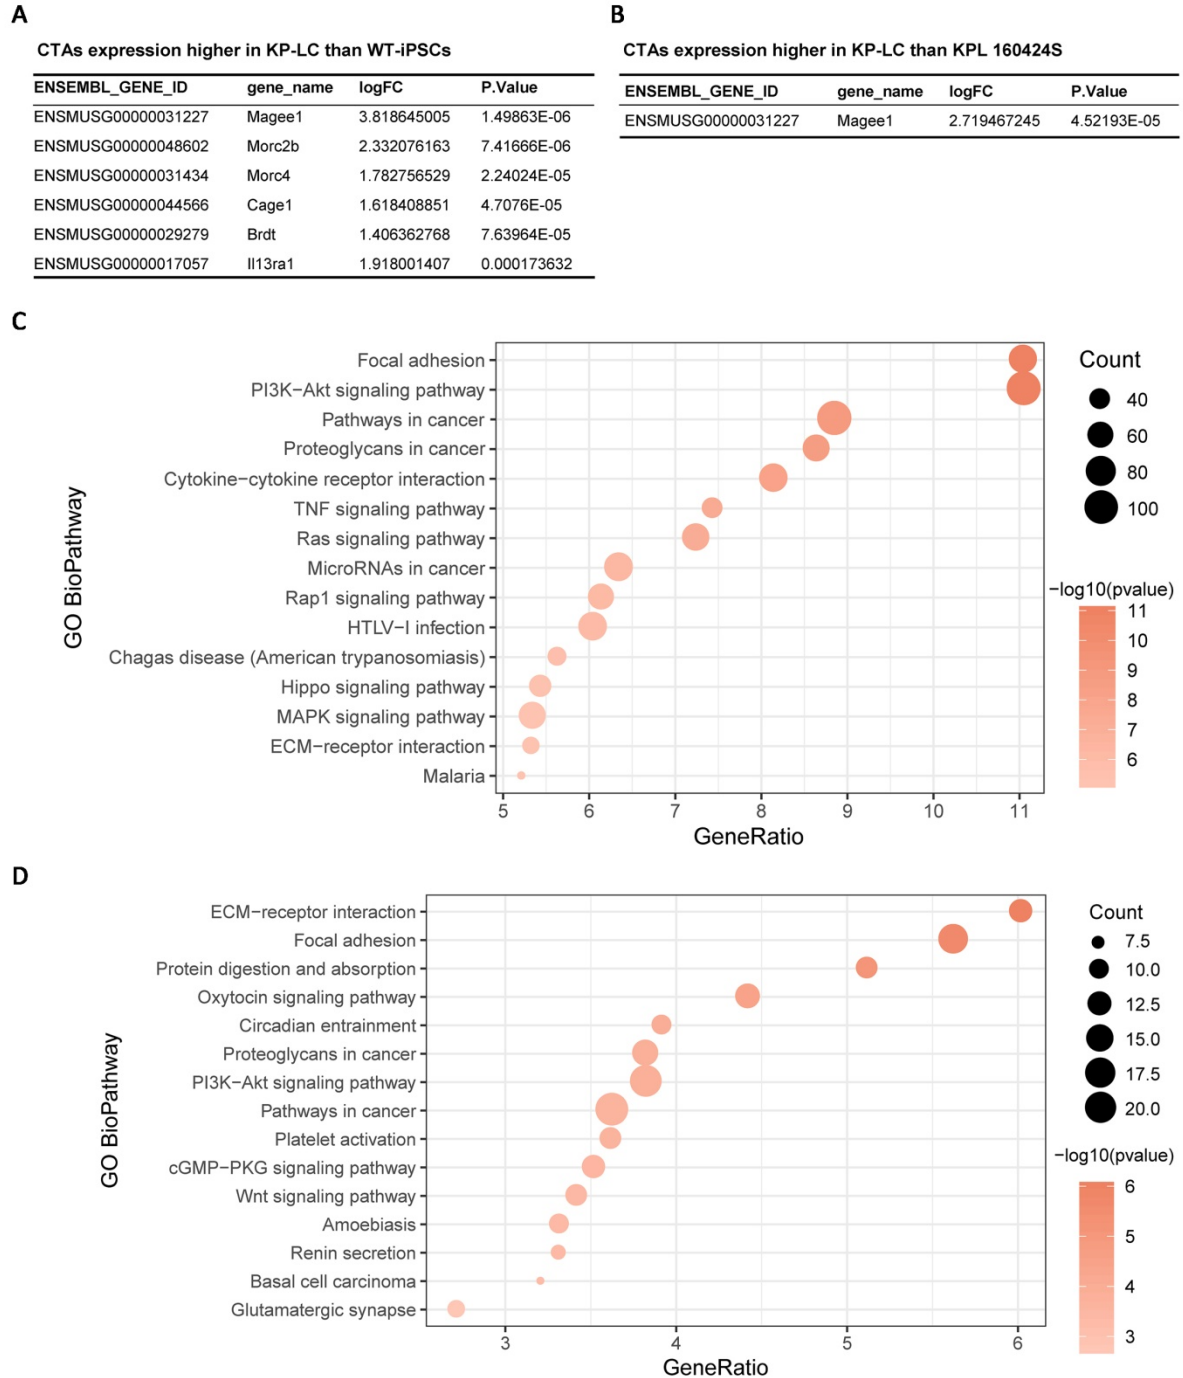

**Figure S2. Analysis of gene differential expression.** (A) Cancer-testis antigens (CTAs) differential expression between KP-LC and WT-iPSCs. (B) CTAs differential expression between KP-LC and KPL 160424S. (C) Gene Ontology (GO) analysis of gene expression higher in KP-LC than WT-iPSCs (P.Value<0.001). (D) GO analysis of gene expression higher in KP-LC than KPL 160424S (P.Value<0.001).

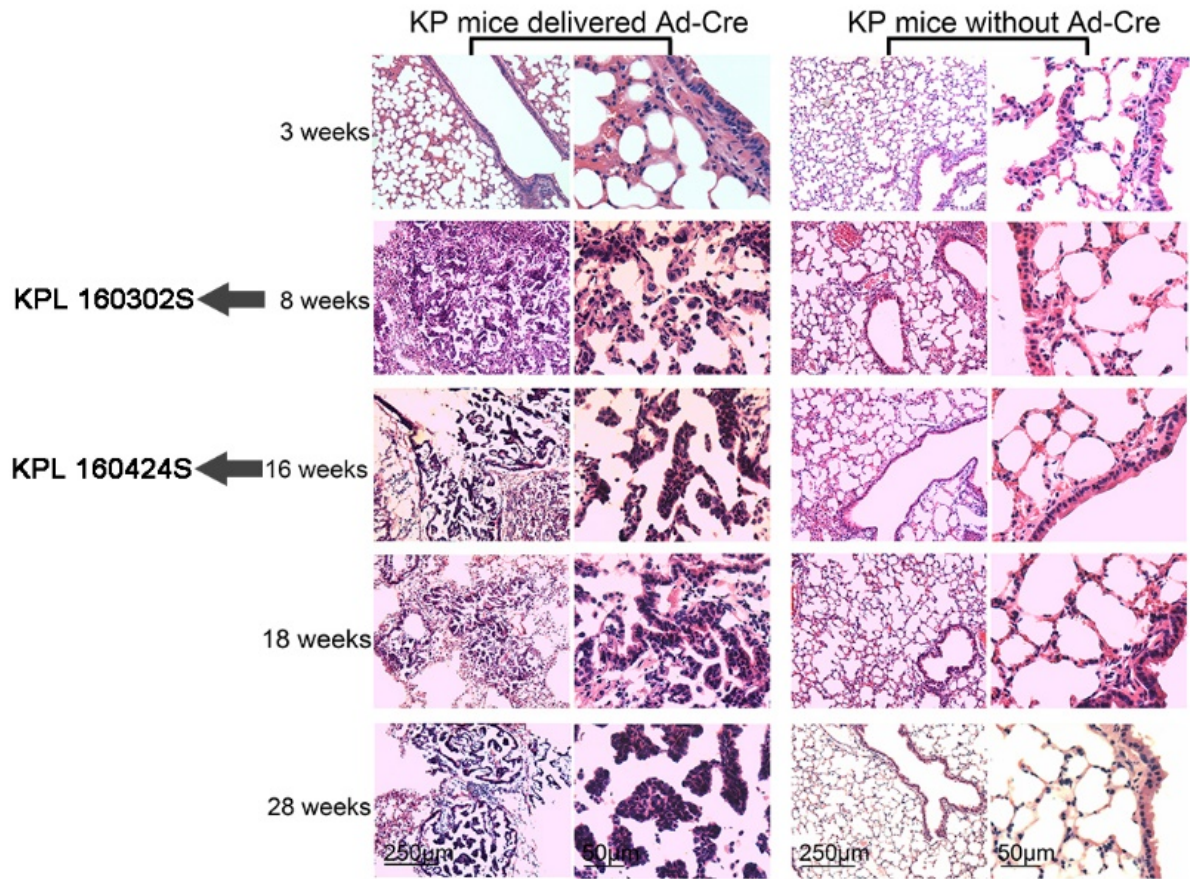

**Figure S3. Tumor progression of KP mice after delivery of Ad-Cre.** H&E stained lungs from KP mice at various times after intranasal infection with Ad-Cre. KP mice at the same age without delivery of Ad-Cre are shown as a control. KPL 160302S and KPL 160424S were cultured from the 8 weeks and 16 weeks post Ad-Cre inhalation of KP mice.



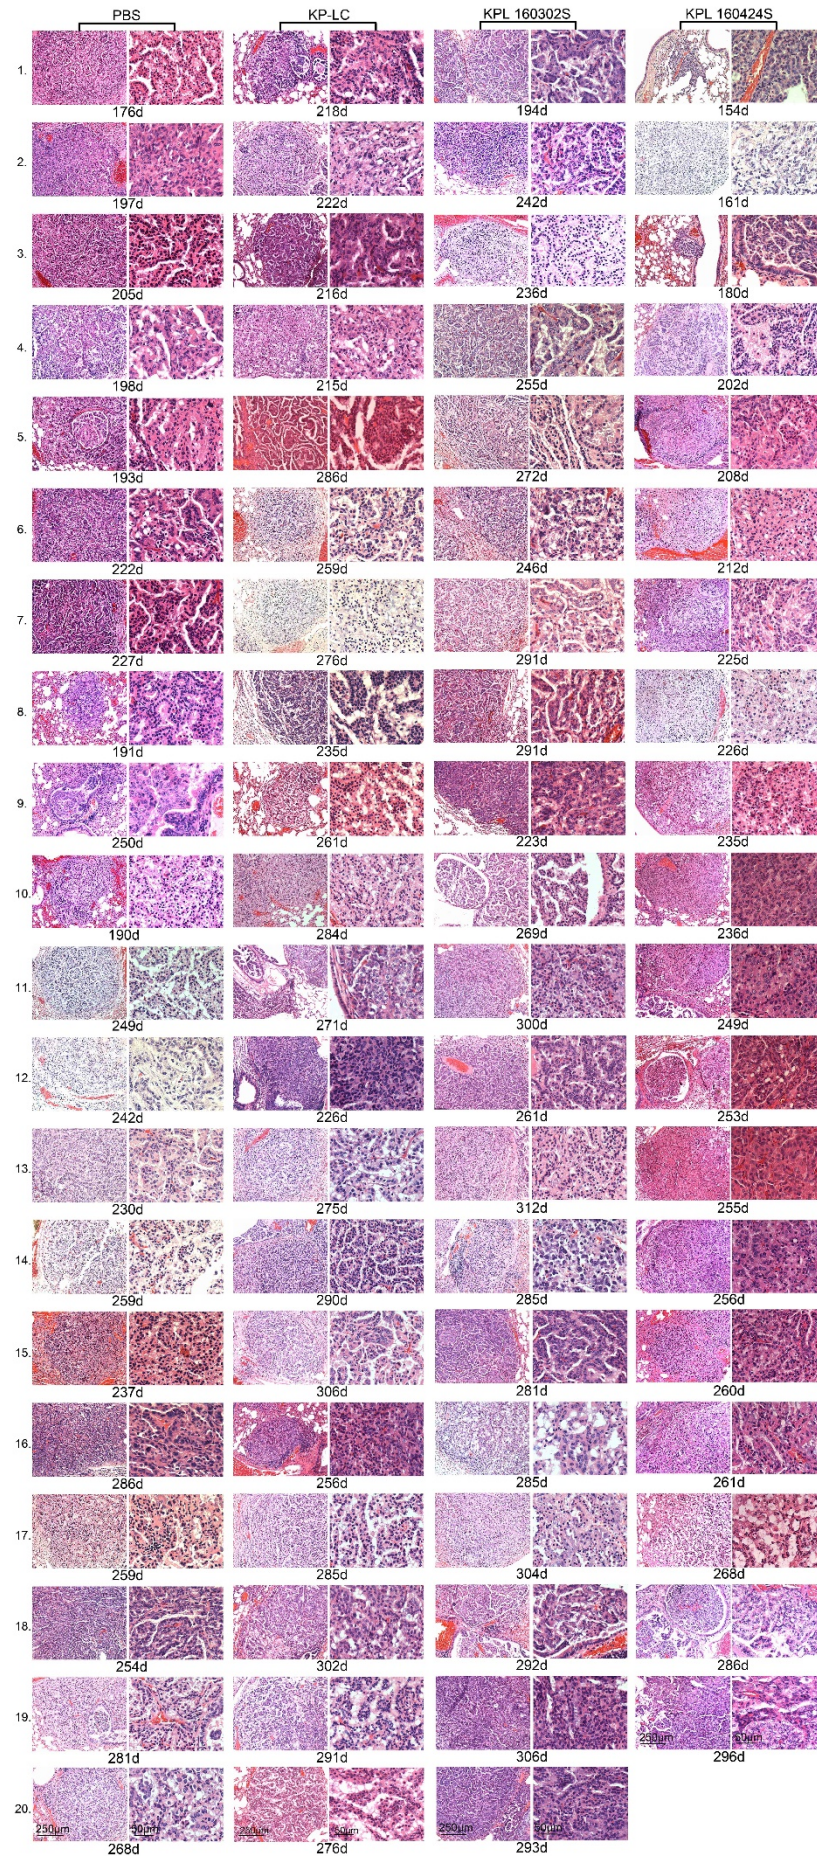

**Figure S4. H&E staining of murine lungs after KP-LC, KPL 160302S and KPL 160424S vaccination treatment.** Representative histopathology of H&E staining of lungs in the survival experiment with KP-LC, KPL 160302S and KPL 160424S vaccination.



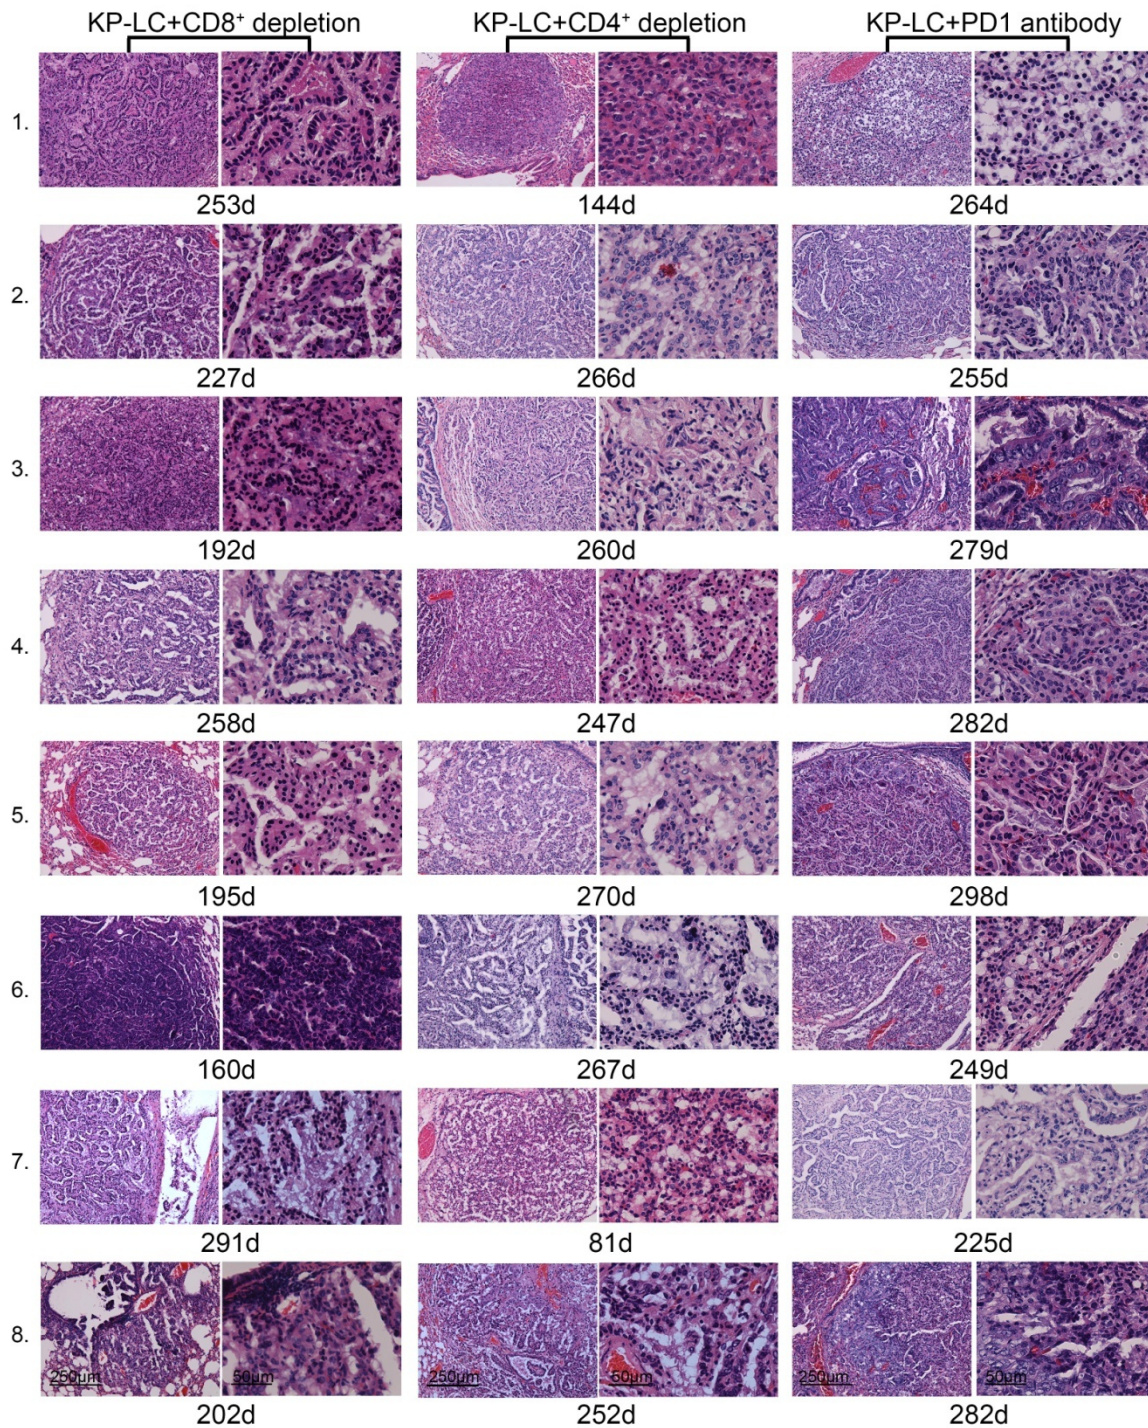

**Figure S5. H&E staining of murine lungs after KP-LC VIREST with CD8<sup>+</sup> T cells or CD4<sup>+</sup> T cell depletion or PD1 antibody.** Representative histopathology of H&E staining of lungs in the survival experiment with CD8<sup>+</sup> T cells or CD4<sup>+</sup> T cells depletion or PD1 antibody.



**Table S1. Cell lines created or used in this study**

| Name               | Derivation                                                             | Mutations                                                         | Notes                                                                                                                                           |
|--------------------|------------------------------------------------------------------------|-------------------------------------------------------------------|-------------------------------------------------------------------------------------------------------------------------------------------------|
| <b>WT iPSC</b>     | 129J/C57Bl6 male mice                                                  | None                                                              | Un-mutated somatic cells driven to pluripotency.                                                                                                |
| <b>WT-KP iPSC</b>  | 129J/C57Bl6 male mice                                                  | Inactivated<br>Kras <sup>G12D/+</sup><br>Trp53 <sup>R172H/+</sup> | Heterozygous KRas and p53 mutation introduced into WT iPSCs.                                                                                    |
| <b>KPC</b>         | LSL-Kras <sup>G12D/+</sup> ; Trp53 <sup>R172H/+</sup> ; Pdx-1-Cre mice | Activated<br>Kras <sup>G12D/+</sup><br>Trp53 <sup>R172H/+</sup>   | Somatic cells containing silent mutations driven to pluripotency. Mutations activated upon differentiation into PPLC to create KPC tumor cells. |
| <b>KP-AC</b>       | 129J/C57Bl6 male mice                                                  | Activated<br>Kras <sup>G12D/+</sup><br>Trp53 <sup>R172H/+</sup>   | Mutations in WT-KP cells activated after differentiation into PPLCs by infection with Ad5-Cre.                                                  |
| <b>KP-LC</b>       | 129J/ C57Bl6 male mice                                                 | Activated<br>Kras <sup>G12D/+</sup><br>Trp53 <sup>R172H/+</sup>   | WT-KP iPSCs were differentiated into lung progenitor cells, and infected with Ad5-Cre to activate mutations.                                    |
| <b>TB11381</b>     | LSL-Kras <sup>G12D/+</sup> ; Trp53 <sup>R172H/+</sup> ; Pdx-1-Cre mice | Activated<br>Kras <sup>G12D/+</sup><br>Trp53 <sup>R172H/+</sup>   | PDAC cell line isolated from tumours arisen in pancreas of LSL-Kras <sup>G12D/+</sup> ; Trp53 <sup>R172H/+</sup> ; Pdx-1-Cre transgenic mouse.  |
| <b>KPL 160302S</b> | LSL-Kras <sup>G12D/+</sup> ; Trp53 <sup>R172H/+</sup> male mice        | Activated<br>Kras <sup>G12D/+</sup><br>Trp53 <sup>R172H/-</sup>   | Lung adenocarcinoma cell line from KP mice 8 weeks after intranasal delivery of Ad-Cre.                                                         |
| <b>KPL 160424S</b> | LSL-Kras <sup>G12D/+</sup> ; Trp53 <sup>R172H/+</sup> male mice        | Activated<br>Kras <sup>G12D/+</sup><br>Trp53 <sup>R172H/+</sup>   | Lung adenocarcinoma cell line from KP mice 16 weeks after intranasal delivery of Ad-Cre.                                                        |
| <b>KPL-234S</b>    | LSL-Kras <sup>G12D/+</sup> ; Trp53 <sup>R172H</sup> male mice          | Activated<br>Kras <sup>G12D/+</sup><br>Trp53 <sup>R172H</sup>     | Lung adenocarcinoma cell line from KP mice after intranasal delivery of Ad-Cre.                                                                 |
| <b>MOSEC</b>       | C57Bl6 female mice                                                     |                                                                   | By repeated passaging <i>in vitro</i> , the late passage mouse ovarian surface epithelial cells can form tumors <i>in vivo</i> .                |

The cell lines that were used or created during this study are listed along with their origins and mutation status. PPLC: pancreatic progenitor-like cells; iPSC: induced pluripotent stem

cell; Ad5-Cre: non-replicating adenovirus armed with Cre recombinase; PDAC: pancreatic ductal adenocarcinoma. LC: lung cancer.

**Table S2. qRT-PCR primers used for detection of mRNA in iPSCs and differentiated iPSCs**

| <b>Gene</b> | <b>Primer F</b>        | <b>Primer R</b>         |
|-------------|------------------------|-------------------------|
| Actin       | CCTCATGAAGATCCTGACCGA  | TTGCCAATAGTGATGACCTGG   |
| Oct4        | TAGGTGAGCCGTCTTTCCAC   | GCTTAGCCAGGTTTCGAGGAT   |
| Nanog       | CTCAAGTCCTGAGGCTGACA   | TGAAACCTGTCCTTGAGTGC    |
| Foxa2       | TGGTCACTGGGGACAAGGGA   | GCAACAACAGCAATAGAGAAC   |
| Sox17       | GAACAGTTGAGGGGCTACAC   | GTTTAGGGTTTCTTAGATGC    |
| Pax9        | ATCCGCTCCATCACCGACCAAG | CCTTCTCCAATCCATTCACTGCG |
| Tbx1        | CGAGATGATCGTCACCAAGGCA | GTCATCTACGGGCACAAAGTCC  |
| Sox2        | CACAACCTCGGAGATCAGCAA  | CTCCGGGAAGCGTGTACTTA    |
| Nkx2.1      | CAGGACACCATGCGGAACAGC  | GCCATGTTCTTGCTCACGTCC   |
| Sox9        | GACAAGCGGAGGCCGAA      | CCAGCTTGCACGTCGGTT      |
